# Supplementary material
Source: publisher site journal article supplement (https://www.dovepress.com/article/331077)

## Supplementary File 1

```
In [1]: import pandas as pd
import numpy as np
from sklearn.model_selection import train_test_split
from sklearn.ensemble import AdaBoostClassifier
from sklearn.metrics import classification_report
from sklearn.metrics import average_precision_score
from sklearn.metrics import precision_recall_curve
from sklearn.utils import resample
from imblearn.over_sampling import SMOTE
from sklearn.metrics import confusion_matrix
from sklearn.metrics import roc_curve, auc
import matplotlib.pyplot as plt
from imblearn import under_sampling
```

```
In [2]: #reading the data and set target variable
df = pd.read_csv("C:/Users/silve/Desktop/Project_3/mydata.csv")
df.head()
```

```
Out[2]:
```

|   | Maternal_age | Gestational_diabetes | PROM | Gestational_age | Birthweight | Induction_method | Parity | ANC_visits | Referred_for_delivery | Family_plann |
|---|--------------|----------------------|------|-----------------|-------------|------------------|--------|------------|-----------------------|--------------|
| 0 | 37           | 0                    | 0    | 40              | 5.90        | 1                | 0      | 1          | 0                     |              |
| 1 | 29           | 0                    | 1    | 40              | 2.50        | 1                | 1      | 2          | 1                     |              |
| 2 | 30           | 0                    | 1    | 40              | 3.25        | 1                | 1      | 2          | 0                     |              |
| 3 | 26           | 0                    | 0    | 40              | 3.10        | 1                | 0      | 2          | 0                     |              |
| 4 | 28           | 0                    | 0    | 38              | 2.40        | 1                | 0      | 2          | 0                     |              |

```
In [3]: df.shape
```

```
Out[3]: (7716, 17)
```

```
In [4]: X=df.iloc[:,0:16]
y=df.iloc[:,16]
```

```
In [5]: #Splitting the dataset into "Training" and "testing set (for internal validation)"
X_train, X_test, y_train, y_test = train_test_split(X, y,
                                                    test_size=0.3,
                                                    random_state=42)
```

```
In [6]: #Obtaining the proportion or prevalence of Low-Apgar score
from collections import Counter
counter = Counter(df['Apgar_score'])
print(counter)
```

Counter({0: 6983, 1: 733})

```
In [7]: #Building the AdaBoost Model
from sklearn.ensemble import AdaBoostClassifier
from sklearn import datasets

# Create adaboost classifier object
abc = AdaBoostClassifier(n_estimators=150,
                        learning_rate=1)

# Train Adaboost Classifier
model = abc.fit(X_train, y_train)

#Predict the response for test dataset
y_pred = model.predict(X_test)

###Obtaining AUROC metrics
y_pred_roc = model.decision_function(X_test)
Adbst_fpr, Adbst_tpr, threshold = roc_curve(y_test, y_pred_roc)
auc_Adbst = auc(Adbst_fpr, Adbst_tpr)

plt.figure(figsize=(4,4), dpi = 100)
plt.plot(Adbst_fpr, Adbst_tpr, marker='.', label='AdaBoost(auc = %0.3f)' % auc_Adbst)

plt.xlabel('False Positive Rate-->')
plt.ylabel('True Positive Rate -->')

plt.legend()
```

```
plt.show()
```

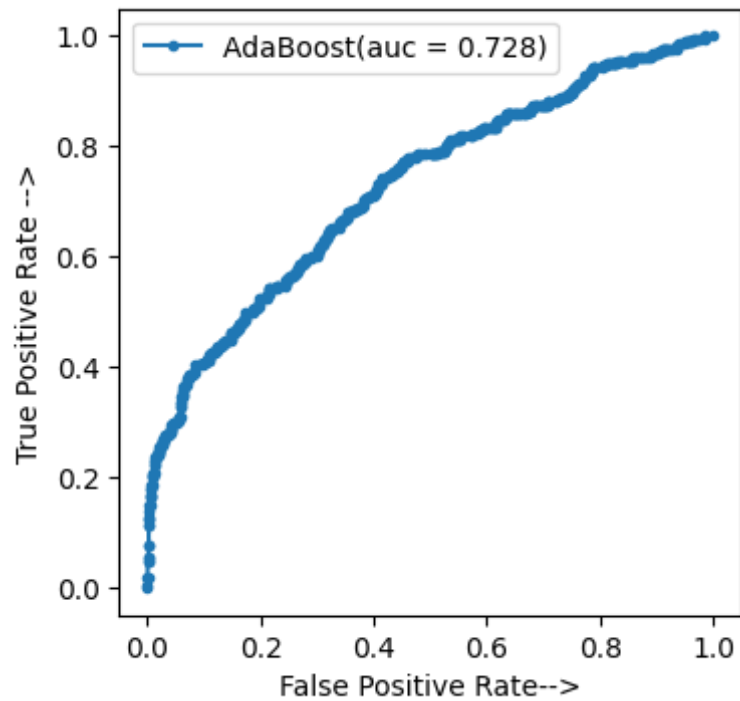

```
In [8]: #Import scikit-learn metrics module for accuracy calculation
from sklearn import metrics
```

```
In [9]: # Obtaining AdaBoost's performance metrics

print("Accuracy:", metrics.accuracy_score(y_test, y_pred))
print(classification_report(y_test, y_pred))
```

```
Accuracy: 0.9144708423326134
              precision    recall  f1-score   support

     0       0.92         0.99         0.95         2090
     1       0.75         0.18         0.29          225
```

|              |      |      |      |      |
|--------------|------|------|------|------|
| accuracy     |      |      | 0.91 | 2315 |
| macro avg    | 0.84 | 0.59 | 0.62 | 2315 |
| weighted avg | 0.90 | 0.91 | 0.89 | 2315 |

```
In [10]: confusion_matrix(y_test, y_pred)
```

```
Out[10]: array([[2077, 13],  
               [ 185, 40]], dtype=int64)
```

```
In [11]: #Obtaining PR-Curve for AdaBoost Classifier
```

```
y_pred_PR_curve = model.predict_proba(X_test)  
y_pred_PR_curve  
#print (type(y_pred_PR_curve))  
y_pred_PR_curve = pd.DataFrame(y_pred_PR_curve)  
#print(type(y_pred_PR_curve))  
y_pred_PR_curve = y_pred_PR_curve.iloc[:,1]  
y_pred_PR_curve  
  
precision, recall, thresholds = precision_recall_curve(y_test, y_pred_PR_curve)
```

```
In [12]: plt.plot(recall, precision, label = "AdaBoost(Area = %.2f)" )  
plt.xlabel('Recall')  
plt.ylabel('Precision')  
plt.legend(loc = "upper left")  
plt.title("Precision - Recall curve")
```

```
Out[12]: Text(0.5, 1.0, 'Precision - Recall curve')
```

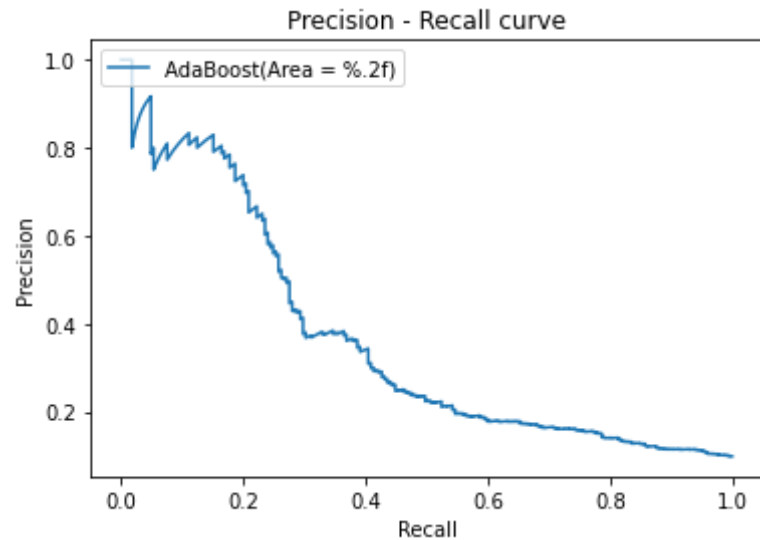

```
In [13]: #Performing SMOTE resampling Prior to AdaBoost Classifier  
from sklearn.metrics import average_precision_score  
from sklearn.metrics import precision_recall_curve  
from sklearn.utils import resample  
from imblearn.over_sampling import SMOTE
```

```
In [14]: smote = SMOTE()
```

```
In [15]: X_train_smote, y_train_smote = smote.fit_sample(X_train, y_train)
```

```
In [16]: # Train Adaboost Classifier  
model = abc.fit(X_train_smote, y_train_smote)  
  
#Predict the response for test dataset  
y_pred = model.predict(X_test)  
  
#Performance metrics for AdaBoost after SMOTE resampling  
print(classification_report(y_test, y_pred))  
confusion_matrix(y_test, y_pred)
```

|              | precision | recall | f1-score | support |
|--------------|-----------|--------|----------|---------|
| 0            | 0.93      | 0.81   | 0.87     | 2090    |
| 1            | 0.20      | 0.44   | 0.28     | 225     |
| accuracy     |           |        | 0.78     | 2315    |
| macro avg    | 0.57      | 0.63   | 0.57     | 2315    |
| weighted avg | 0.86      | 0.78   | 0.81     | 2315    |

```
Out[16]: array([[1700, 390],
 [ 125, 100]], dtype=int64)
```

```
In [17]: #Obtaining AUROC metrics for AdaBoost_SMOTE
y_pred_roc = model.decision_function(X_test)
AdbstSM_fpr, AdbstSM_tpr, threshold = roc_curve(y_test, y_pred_roc)
auc_AdbstSM = auc(AdbstSM_fpr, AdbstSM_tpr)
plt.figure(figsize=(4,4), dpi = 100)
plt.plot(AdbstSM_fpr, AdbstSM_tpr, marker='.', label='AdaBoostSMOTE(auc = %0.3f)' % auc_AdbstSM)
plt.xlabel('False Positive Rate-->')
plt.ylabel('True Positive Rate -->')

plt.legend()

plt.show()
```

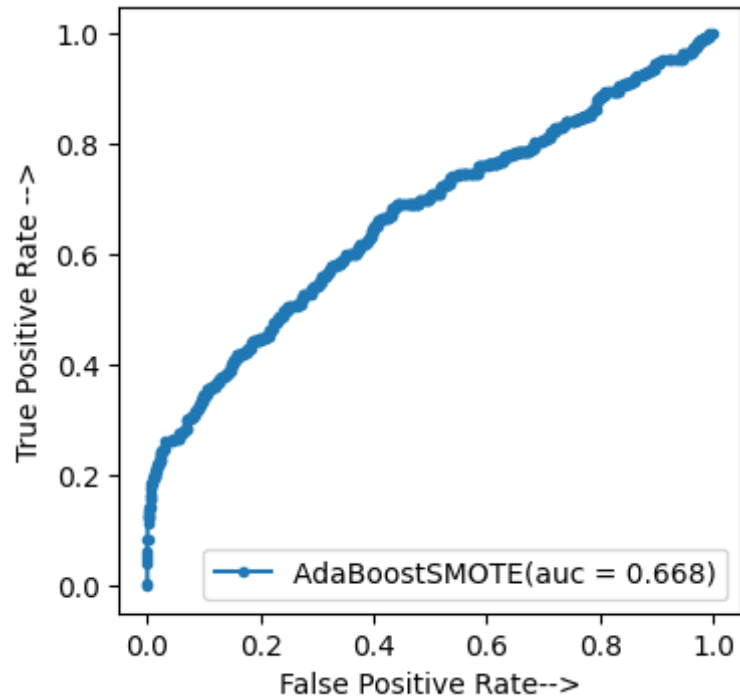

In [18]:

```
#Obtaining PR-curve for AdaBoost_SMOTE

y_pred_PR_curve = model.predict_proba(X_test)
y_pred_PR_curve
print (type(y_pred_PR_curve))
y_pred_PR_curve = pd.DataFrame(y_pred_PR_curve)
print(type(y_pred_PR_curve))
y_pred_PR_curve = y_pred_PR_curve.iloc[:,1]
y_pred_PR_curve

precision, recall, thresholds = precision_recall_curve(y_test, y_pred_PR_curve)

plt.plot(recall, precision, label = "AdaBoostSMOTE(Area = %.2f)" )
plt.xlabel('Recall')
plt.ylabel('Precision')
plt.legend(loc = "upper left")
plt.title("Precision - Recall curve")
```

```
<class 'numpy.ndarray'>
<class 'pandas.core.frame.DataFrame'>
```

Out[18]: Text(0.5, 1.0, 'Precision - Recall curve')

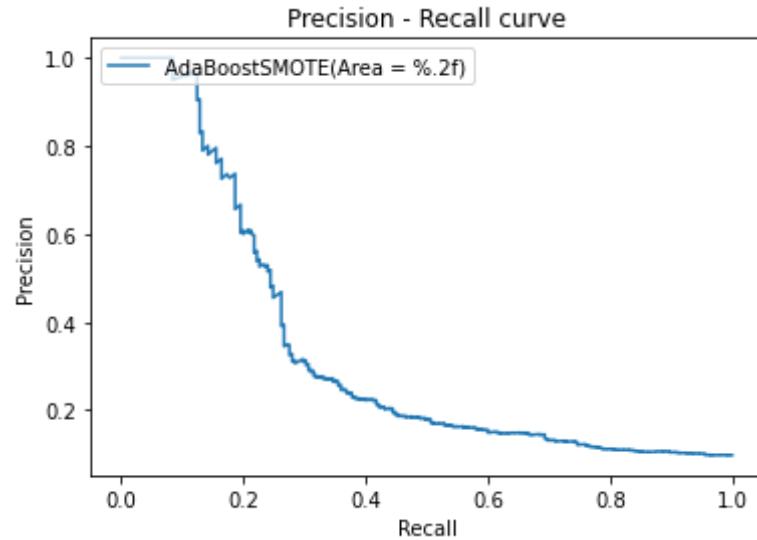

```
In [19]: #Performing Random UnderSampling with AdaBoost Classifier
from imblearn.under_sampling import RandomUnderSampler
rus = RandomUnderSampler(random_state=0)
X_train_rus, y_train_rus = rus.fit_resample(X_train, y_train)
```

```
In [20]: model = abc.fit(X_train_rus, y_train_rus)

#Predict the response for test dataset
y_pred = model.predict(X_test)

#Obtaining performance metrics for AdaBoost_RUS
print(classification_report(y_test, y_pred))
confusion_matrix(y_test, y_pred)
```

|   | precision | recall | f1-score | support |
|---|-----------|--------|----------|---------|
| 0 | 0.94      | 0.76   | 0.84     | 2090    |



```
1      0.19    0.54    0.29    225
accuracy          0.74    2315
macro avg        0.57    0.65    0.56    2315
weighted avg     0.87    0.74    0.79    2315
```

```
Out[20]: array([[1588,  502],
                [ 104,  121]], dtype=int64)
```

```
In [21]: #Obtaining AUROC value for AdaBoost_RUS
y_pred_roc = model.decision_function(X_test)
AdbstRUS_fpr, AdbstRUS_tpr, threshold = roc_curve(y_test, y_pred_roc)
auc_AdbstRUS = auc(AdbstRUS_fpr, AdbstRUS_tpr)
plt.figure(figsize=(5,5), dpi = 100)
plt.plot(AdbstRUS_fpr, AdbstRUS_tpr, marker='.', label='AdaBoostRUS(auc = %0.3f)' % auc_AdbstRUS)
plt.xlabel('False Positive Rate-->')
plt.ylabel('True Positive Rate -->')

plt.legend()

plt.show()
```

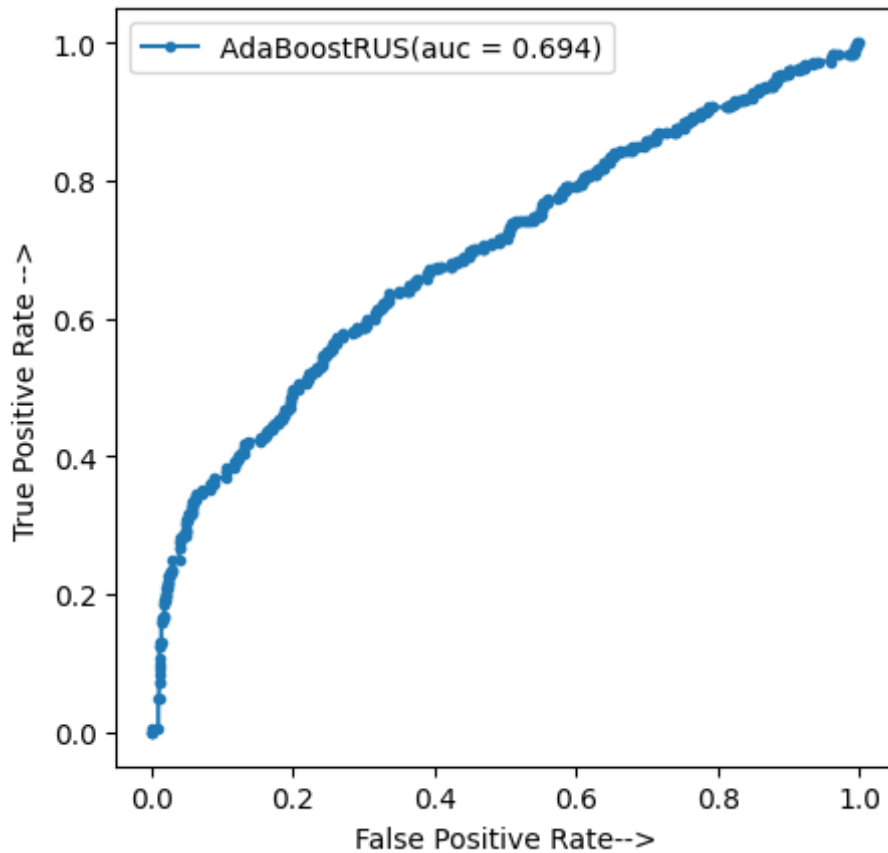

In [26]:

```
#Obtaining PR-curve for AdaBoost with RUS
y_pred_PR_curve = model.predict_proba(X_test)
y_pred_PR_curve
print (type(y_pred_PR_curve))
y_pred_PR_curve = pd.DataFrame(y_pred_PR_curve)
print(type(y_pred_PR_curve))
y_pred_PR_curve = y_pred_PR_curve.iloc[:,1]
y_pred_PR_curve

precision, recall, thresholds = precision_recall_curve(y_test, y_pred_PR_curve)

plt.plot(recall, precision, label = "AdaBoostRUS(Area = %.2f)" )
```

```
plt.xlabel('Recall')
plt.ylabel('Precision')
plt.legend(loc = "upper left")
plt.title("Precision - Recall curve")
```

```
<class 'numpy.ndarray'>
<class 'pandas.core.frame.DataFrame'>
```

Out[26]: Text(0.5, 1.0, 'Precision - Recall curve')

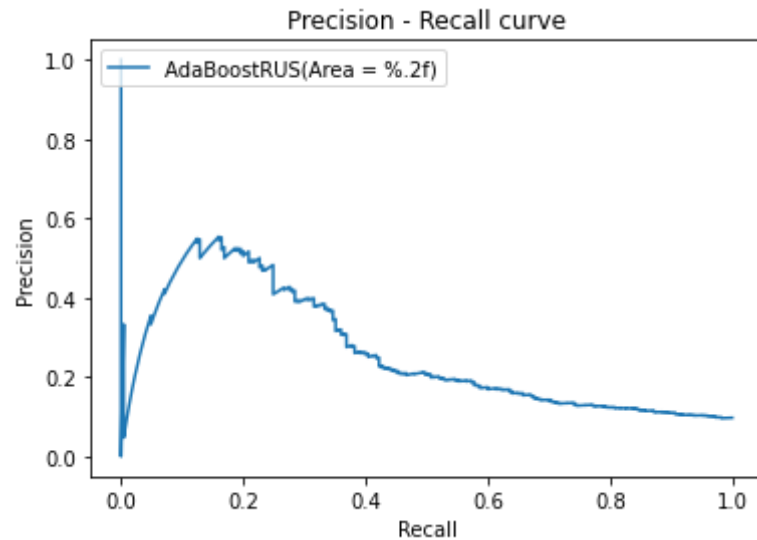

In [25]: *#Obtaining a Combined AUROC metrics for AdaBoost Classifier*

```
plt.figure(figsize=(4,4), dpi = 100)
plt.plot(Adbst_fpr, Adbst_tpr, marker='.', label='AdaBoost(auc = %0.3f)' % auc_Adbst)
plt.plot(AdbstSM_fpr, AdbstSM_tpr, marker='.', label='AdaBoostSMOTE(auc = %0.3f)' % auc_AdbstSM)
plt.plot(AdbstRUS_fpr, AdbstRUS_tpr, marker='.', label='AdaBoostRUS(auc = %0.3f)' % auc_AdbstRUS)
plt.xlabel('False Positive Rate-->')
plt.ylabel('True Positive Rate -->')

plt.legend()

plt.show()
```

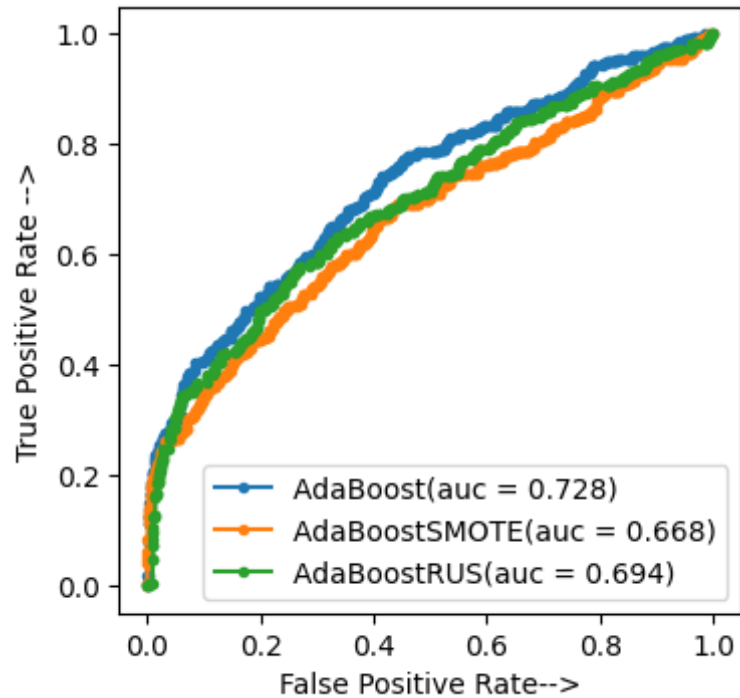

```
In [27]: # Gradient Boosting Classifier#
from sklearn.ensemble import GradientBoostingClassifier
from sklearn.model_selection import GridSearchCV
from sklearn.metrics import roc_auc_score
import matplotlib.pyplot as plt
```

```
In [28]: model_gbm = GradientBoostingClassifier(random_state=42)
model_gbm.fit(X_train, y_train)
y_pred_gbm = model_gbm.predict(X_test)
```

```
In [31]: #Obtaining performance metrics for baseline GB classifier
print(classification_report(y_test, y_pred_gbm))
confusion_matrix(y_test, y_pred_gbm)
```

```
precision    recall  f1-score   support
```

|              |      |      |      |      |
|--------------|------|------|------|------|
| 0            | 0.92 | 0.99 | 0.96 | 2090 |
| 1            | 0.80 | 0.19 | 0.31 | 225  |
| accuracy     |      |      | 0.92 | 2315 |
| macro avg    | 0.86 | 0.59 | 0.63 | 2315 |
| weighted avg | 0.91 | 0.92 | 0.89 | 2315 |

```
Out[31]: array([[2079, 11],  
               [ 182, 43]], dtype=int64)
```

```
In [29]: #Obtaining AUROC metrics for baseline GB classifier  
y_pred_roc = model_gbm.decision_function(X_test)  
gbm_fpr, gbm_tpr, threshold = roc_curve(y_test, y_pred_roc)  
auc_gbm = auc(gbm_fpr, gbm_tpr)  
plt.figure(figsize=(4,4), dpi = 100)  
plt.plot(gbm_fpr, gbm_tpr, marker='.', label='Gradient Boosting(auc = %0.3f)' % auc_gbm)  
plt.xlabel('False Positive Rate-->')  
plt.ylabel('True Positive Rate -->')  
  
plt.legend()  
  
plt.show()
```

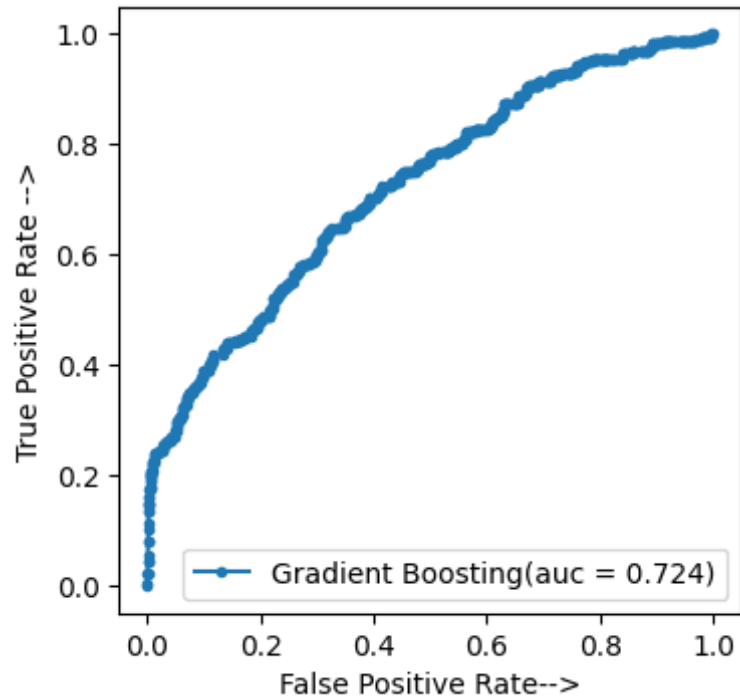

In [33]:

```
#Obtainig PR-Curve for Baseline GB classifier
y_pred_PR_curve = model_gbm.predict_proba(X_test)
y_pred_PR_curve
print (type(y_pred_PR_curve))
y_pred_PR_curve = pd.DataFrame(y_pred_PR_curve)
print(type(y_pred_PR_curve))
y_pred_PR_curve = y_pred_PR_curve.iloc[:,1]
y_pred_PR_curve

precision, recall, thresholds = precision_recall_curve(y_test, y_pred_PR_curve)

plt.plot(recall, precision, label = "GBM(Area = %.2f)" )
plt.xlabel('Recall')
plt.ylabel('Precision')
plt.legend(loc = "upper left")
plt.title("Precision - Recall curve")
```

```
<class 'numpy.ndarray'>
<class 'pandas.core.frame.DataFrame'>
```

Out[33]: Text(0.5, 1.0, 'Precision - Recall curve')

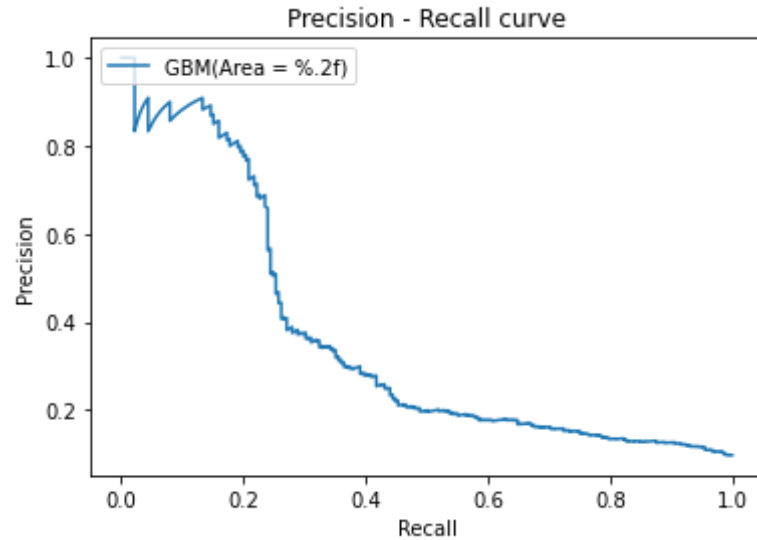

```
In [34]: #Performing SMOTE with GBM
model_gbm = GradientBoostingClassifier(random_state=42)
model_gbm.fit(X_train_smote, y_train_smote)
y_pred_gb_SM = model_gbm.predict(X_test)
```

```
In [36]: #Obtaining performance metrics for GB with SMOTE
print(classification_report(y_test, y_pred_gb_SM))
confusion_matrix(y_test, y_pred_gb_SM)
```

|              | precision | recall | f1-score | support |
|--------------|-----------|--------|----------|---------|
| 0            | 0.93      | 0.86   | 0.89     | 2090    |
| 1            | 0.23      | 0.40   | 0.29     | 225     |
| accuracy     |           |        | 0.81     | 2315    |
| macro avg    | 0.58      | 0.63   | 0.59     | 2315    |
| weighted avg | 0.86      | 0.81   | 0.83     | 2315    |

```
Out[36]: array([[1790, 300],
                [ 136,  89]], dtype=int64)
```

```
In [38]: #Obtaining AUROC metrics for GM with SMOTE
y_pred_roc = model_gbm.decision_function(X_test)
gbSM_fpr, gbSM_tpr, threshold = roc_curve(y_test, y_pred_roc)
auc_gbSM = auc(gbSM_fpr, gbSM_tpr)
plt.figure(figsize=(4,4), dpi = 100)
plt.plot(gbSM_fpr, gbSM_tpr, marker='.', label='gbmSMOTE(auc = %0.3f)' % auc_gbSM)
plt.xlabel('False Positive Rate-->')
plt.ylabel('True Positive Rate -->')

plt.legend()

plt.show()
```

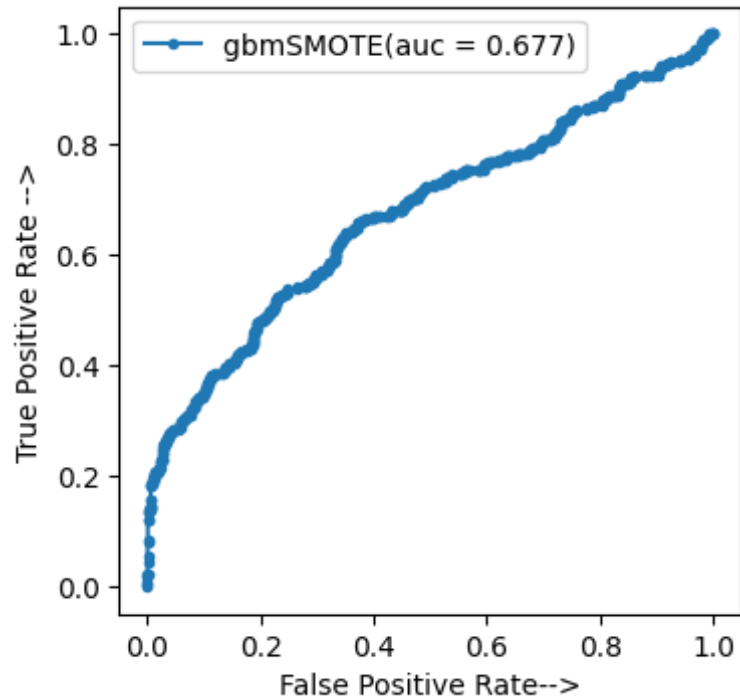

```
In [40]: #Obtaining PR-Curve for GB with SMOTE
```



```

y_pred_PR_curve = model_gbm.predict_proba(X_test)
y_pred_PR_curve
print (type(y_pred_PR_curve))
y_pred_PR_curve = pd.DataFrame(y_pred_PR_curve)
print(type(y_pred_PR_curve))
y_pred_PR_curve = y_pred_PR_curve.iloc[:,1]
y_pred_PR_curve

precision, recall, thresholds = precision_recall_curve(y_test, y_pred_PR_curve)

plt.plot(recall, precision, label = "GBM_SMOTE(Area = %.2f)" )
plt.xlabel('Recall')
plt.ylabel('Precision')
plt.legend(loc = "upper left")
plt.title("Precision - Recall curve")

```

```

<class 'numpy.ndarray'>
<class 'pandas.core.frame.DataFrame'>

```

Out[40]: Text(0.5, 1.0, 'Precision - Recall curve')

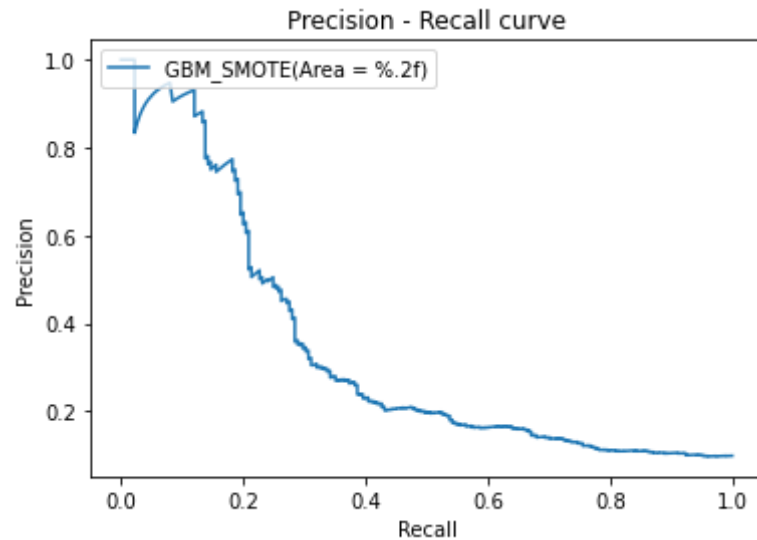

```

In [42]: #Performing GB with Random UnderSampling (RUS)

model_gbm = GradientBoostingClassifier(random_state=42)

```

```
model_gbm.fit(X_train_rus, y_train_rus)
y_pred_gb_RUS = model_gbm.predict(X_test)
```

```
In [43]: #Obtaining performance metrics for GB with RUS
print(classification_report(y_test, y_pred_gb_RUS))
confusion_matrix(y_test, y_pred_gb_RUS)
```

|              | precision | recall | f1-score | support |
|--------------|-----------|--------|----------|---------|
| 0            | 0.94      | 0.79   | 0.85     | 2090    |
| 1            | 0.20      | 0.49   | 0.28     | 225     |
| accuracy     |           |        | 0.76     | 2315    |
| macro avg    | 0.57      | 0.64   | 0.57     | 2315    |
| weighted avg | 0.86      | 0.76   | 0.80     | 2315    |

```
Out[43]: array([[1645, 445],
               [ 114, 111]], dtype=int64)
```

```
In [45]: #Obtaining AUROC metrics for GM with RUS
y_pred_roc = model_gbm.decision_function(X_test)
gbRUS_fpr, gbRUS_tpr, threshold = roc_curve(y_test, y_pred_roc)
auc_gbRUS = auc(gbRUS_fpr, gbRUS_tpr)
plt.figure(figsize=(4,4), dpi = 100)
plt.plot(gbRUS_fpr, gbRUS_tpr, marker='.', label='gbmRUS(auc = %0.3f)' % auc_gbRUS)
plt.xlabel('False Positive Rate-->')
plt.ylabel('True Positive Rate -->')

plt.legend()

plt.show()
```

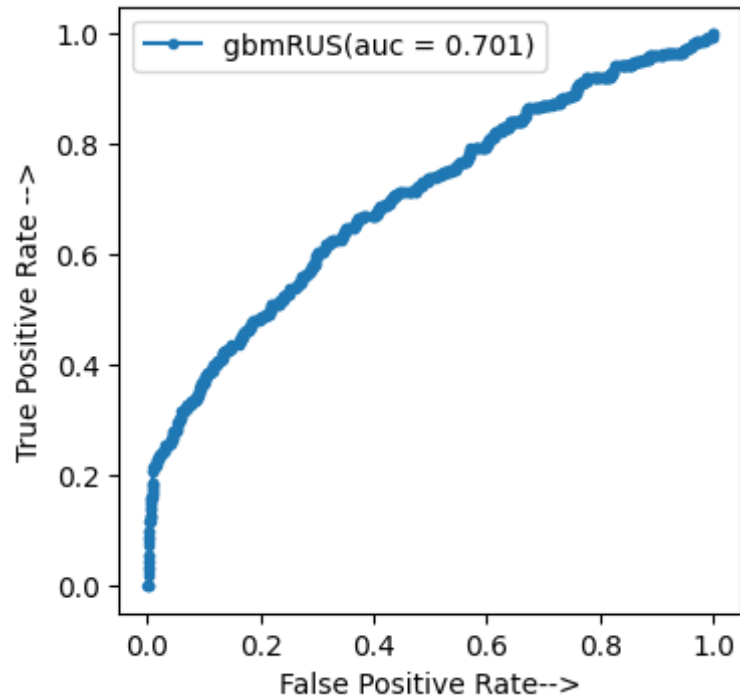

In [47]:

```
#Obtaining PR-Curve for GB with RUS
y_pred_PR_curve = model_gbm.predict_proba(X_test)
y_pred_PR_curve
print (type(y_pred_PR_curve))
y_pred_PR_curve = pd.DataFrame(y_pred_PR_curve)
print(type(y_pred_PR_curve))
y_pred_PR_curve = y_pred_PR_curve.iloc[:,1]
y_pred_PR_curve

precision, recall, thresholds = precision_recall_curve(y_test, y_pred_PR_curve)

plt.plot(recall, precision, label = "GBM_RUS(Area = %.2f)" )
plt.xlabel('Recall')
plt.ylabel('Precision')
plt.legend(loc = "upper left")
plt.title("Precision - Recall curve")
```

```
<class 'numpy.ndarray'>  
<class 'pandas.core.frame.DataFrame'>
```

Out[47]: Text(0.5, 1.0, 'Precision - Recall curve')

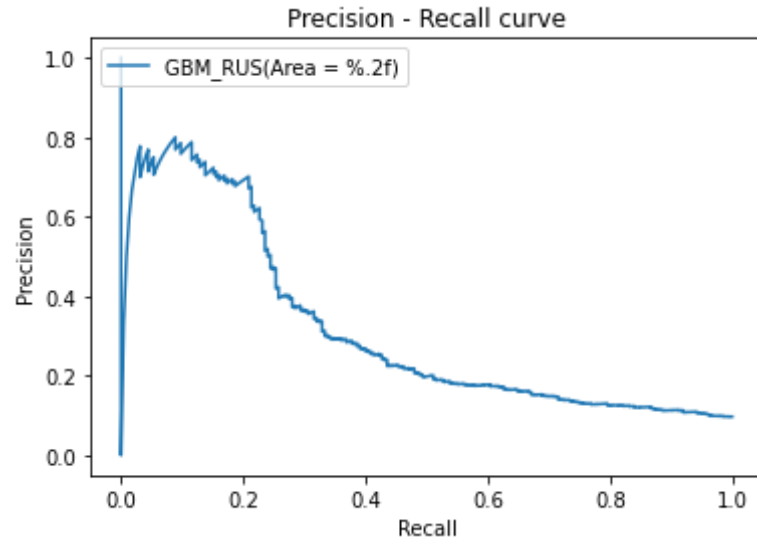

In [46]:

```
#Obtaining a Combined AUROC metrics for Gradient Boosting Classifier  
plt.figure(figsize=(4,4), dpi = 100)  
plt.plot(gbm_fpr, gbm_tpr, marker='.',label='Gradient Boosting(auc = %0.3f)' % auc_gbm)  
plt.plot(gbSM_fpr, gbSM_tpr, marker='.',label='gbmSMOTE(auc = %0.3f)' % auc_gbSM)  
plt.plot(gbRUS_fpr, gbRUS_tpr, marker='.',label='gbmRUS(auc = %0.3f)' % auc_gbRUS)  
plt.xlabel('False Positive Rate-->')  
plt.ylabel('True Positive Rate -->')  
  
plt.legend()  
  
plt.show()
```

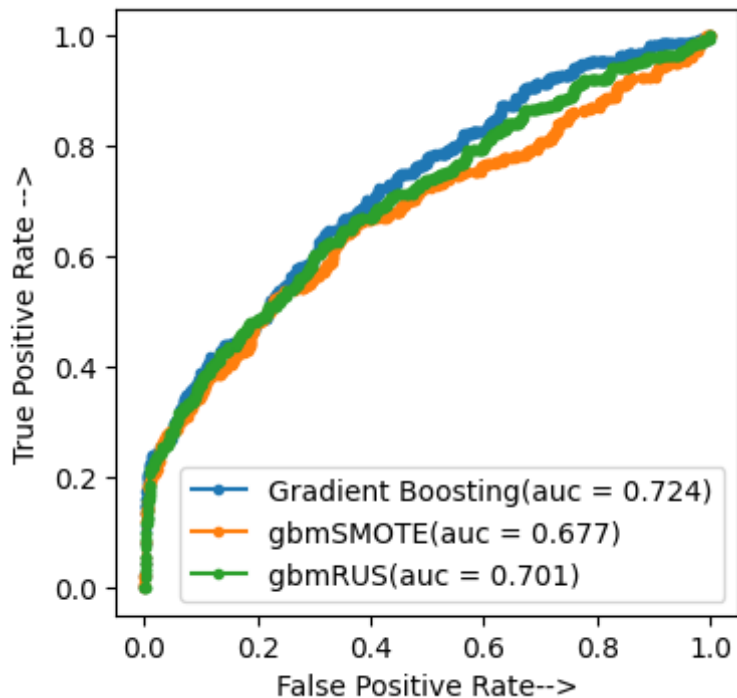

In [48]:

```

#Performing XGBoost Classifier
from xgboost import XGBClassifier
XGBClassifier()
model = XGBClassifier(random_state=42)
model.fit(X_train, y_train)

```

c:\users\silve\appdata\local\programs\python\python38\lib\site-packages\xgboost\sklearn.py:1146: UserWarning: The use of label encoder in XGBClassifier is deprecated and will be removed in a future release. To remove this warning, do the following: 1) Pass option use\_label\_encoder=False when constructing XGBClassifier object; and 2) Encode your labels (y) as integers starting with 0, i.e. 0, 1, 2, ..., [num\_class - 1].

warnings.warn(label\_encoder\_deprecation\_msg, UserWarning)

[16:42:30] WARNING: C:/Users/Administrator/workspace/xgboost-win64\_release\_1.4.0/src/learner.cc:1095: Starting in XGBoost 1.3.0, the default evaluation metric used with the objective 'binary:logistic' was changed from 'error' to 'logloss'. Explicitly set eval\_metric if you'd like to restore the old behavior.

Out[48]: XGBClassifier(base\_score=0.5, booster='gbtree', colsample\_bylevel=1, colsample\_bynode=1, colsample\_bytree=1, gamma=0, gpu\_id=-1, importance\_type='gain', interaction\_constraints='',

```
learning_rate=0.300000012, max_delta_step=0, max_depth=6,
min_child_weight=1, missing=nan, monotone_constraints='()',
n_estimators=100, n_jobs=8, num_parallel_tree=1, random_state=42,
reg_alpha=0, reg_lambda=1, scale_pos_weight=1, subsample=1,
tree_method='exact', validate_parameters=1, verbosity=None)
```

```
In [54]: #Obtaining baseline performance metrics for XGBoost
y_pred = model.predict(X_test)
print(classification_report(y_test, y_pred))
confusion_matrix(y_test, y_pred)
```

|              | precision | recall | f1-score | support |
|--------------|-----------|--------|----------|---------|
| 0            | 0.92      | 0.99   | 0.95     | 2090    |
| 1            | 0.69      | 0.20   | 0.30     | 225     |
| accuracy     |           |        | 0.91     | 2315    |
| macro avg    | 0.80      | 0.59   | 0.63     | 2315    |
| weighted avg | 0.90      | 0.91   | 0.89     | 2315    |

```
Out[54]: array([[2070,  20],
               [ 181,  44]], dtype=int64)
```

```
In [49]: #Obtaining AUROC metrics for XGBoost
y_pred_roc = model.predict_proba(X_test)[:,1]
Xgb_fpr, Xgb_tpr, threshold = roc_curve(y_test, y_pred_roc)
auc_Xgb = auc(Xgb_fpr, Xgb_tpr)
plt.figure(figsize=(4,4), dpi = 100)
plt.plot(Xgb_fpr, Xgb_tpr, marker='.', label='Xgbm(auc = %0.3f)' % auc_Xgb)
plt.xlabel('False Positive Rate-->')
plt.ylabel('True Positive Rate -->')

plt.legend()

plt.show()
```

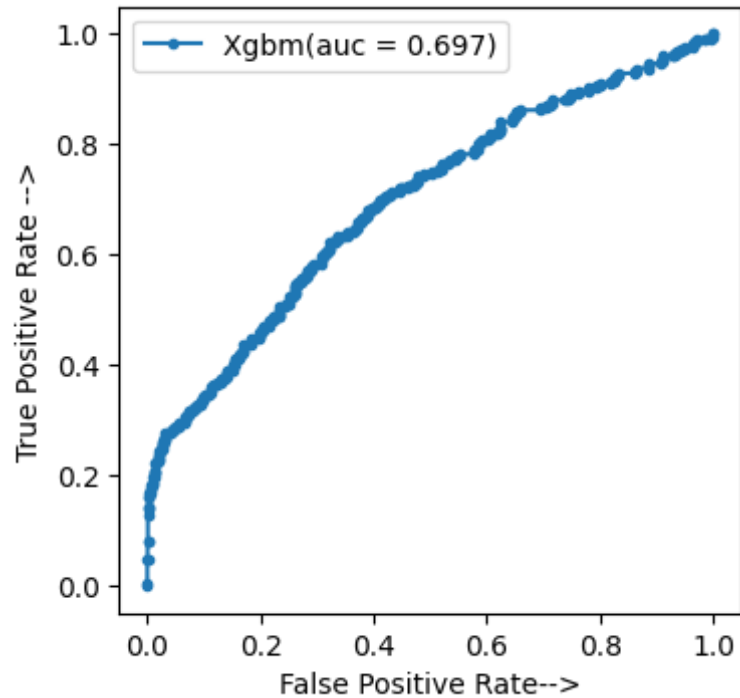

In [57]:

```
#Obtaining PR-Curve for XGBoost
y_pred_PR_curve = model.predict_proba(X_test)
y_pred_PR_curve
print (type(y_pred_PR_curve))
y_pred_PR_curve = pd.DataFrame(y_pred_PR_curve)
print(type(y_pred_PR_curve))
y_pred_PR_curve = y_pred_PR_curve.iloc[:,1]
y_pred_PR_curve

precision, recall, thresholds = precision_recall_curve(y_test, y_pred_PR_curve)

plt.plot(recall, precision, label = "XGBM(Area = %.2f)" )
plt.xlabel('Recall')
plt.ylabel('Precision')
plt.legend(loc = "upper left")
plt.title("Precision - Recall curve")
```

```
<class 'numpy.ndarray'>
<class 'pandas.core.frame.DataFrame'>
```

Out[57]: Text(0.5, 1.0, 'Precision - Recall curve')

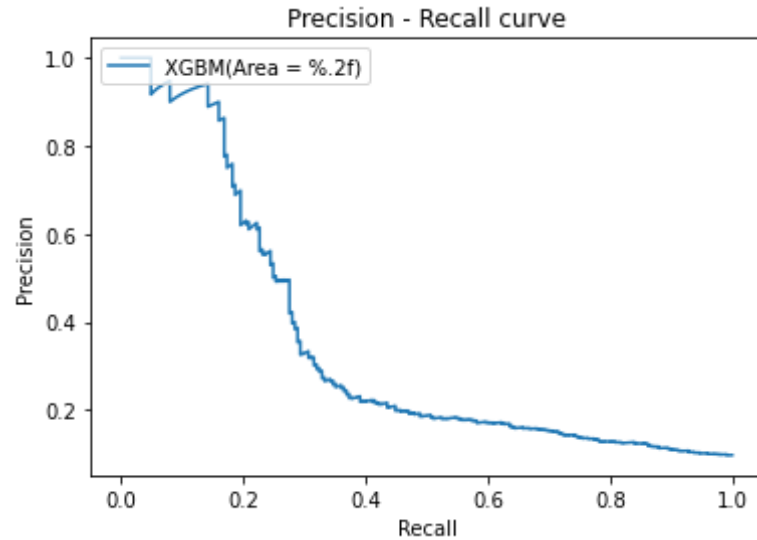

```
In [58]: #Performing SMOTE with XGBoost classifier
model = XGBClassifier(random_state=42)
model.fit(X_train_smote, y_train_smote)
y_pred = model.predict(X_test)
```

```
c:\users\silve\appdata\local\programs\python\python38\lib\site-packages\xgboost\sklearn.py:1146: UserWarning: The use
of label encoder in XGBClassifier is deprecated and will be removed in a future release. To remove this warning, do t
he following: 1) Pass option use_label_encoder=False when constructing XGBClassifier object; and 2) Encode your label
s (y) as integers starting with 0, i.e. 0, 1, 2, ..., [num_class - 1].
```

```
warnings.warn(label_encoder_deprecation_msg, UserWarning)
```

```
[16:53:32] WARNING: C:/Users/Administrator/workspace/xgboost-win64_release_1.4.0/src/learner.cc:1095: Starting in XGB
oost 1.3.0, the default evaluation metric used with the objective 'binary:logistic' was changed from 'error' to 'logl
oss'. Explicitly set eval_metric if you'd like to restore the old behavior.
```

```
In [59]: #Obtaining performance metrics for XGBoost with SMOTE
print(classification_report(y_test, y_pred))
confusion_matrix(y_test, y_pred)
```

```
precision    recall  f1-score   support
```



|              |      |      |      |      |
|--------------|------|------|------|------|
| 0            | 0.92 | 0.95 | 0.94 | 2090 |
| 1            | 0.38 | 0.27 | 0.32 | 225  |
| accuracy     |      |      | 0.89 | 2315 |
| macro avg    | 0.65 | 0.61 | 0.63 | 2315 |
| weighted avg | 0.87 | 0.89 | 0.88 | 2315 |

```
Out[59]: array([[1992, 98],  
               [ 164, 61]], dtype=int64)
```

```
In [60]: #Obtaining AUROC metrics for XGBoost with SMOTE  
y_pred_roc = model.predict_proba(X_test)[:,-1]  
XgbSM_fpr, XgbSM_tpr, threshold = roc_curve(y_test, y_pred_roc)  
auc_XgbSM = auc(XgbSM_fpr, XgbSM_tpr)  
plt.figure(figsize=(4,4), dpi = 100)  
plt.plot(XgbSM_fpr, XgbSM_tpr, marker='.', label='XgbSMOTE(auc = %0.3f)' % auc_XgbSM)  
plt.xlabel('False Positive Rate-->')  
plt.ylabel('True Positive Rate -->')  
  
plt.legend()  
  
plt.show()
```

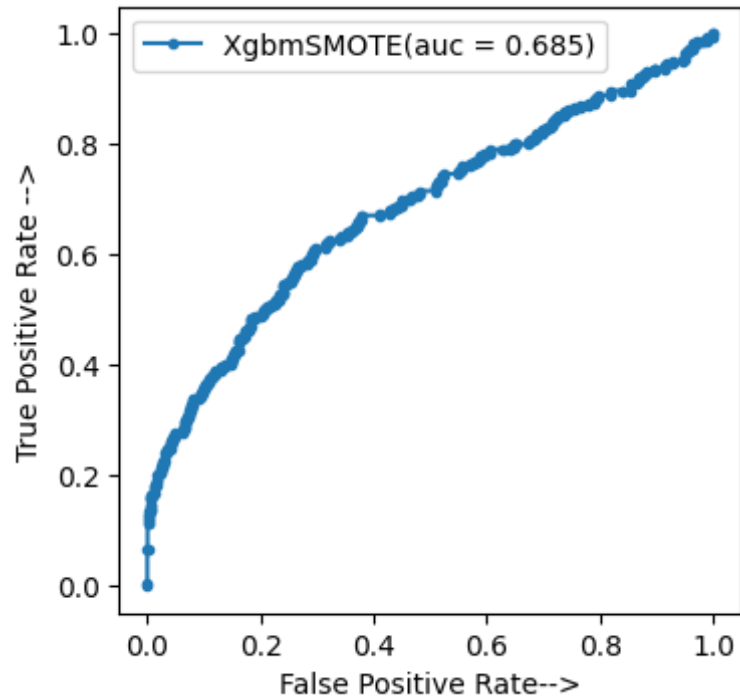

In [69]:

```
#Obtaining PR-Curve for XGBoost with SMOTE
y_pred_PR_curve = model.predict_proba(X_test)
y_pred_PR_curve
print (type(y_pred_PR_curve))
y_pred_PR_curve = pd.DataFrame(y_pred_PR_curve)
print(type(y_pred_PR_curve))
y_pred_PR_curve = y_pred_PR_curve.iloc[:,1]
y_pred_PR_curve

precision, recall, thresholds = precision_recall_curve(y_test, y_pred_PR_curve)

plt.plot(recall, precision, label = "XGBM_SMOTE(Area = %.2f)" )
plt.xlabel('Recall')
plt.ylabel('Precision')
plt.legend(loc = "upper left")
plt.title("Precision - Recall curve")
```

```
<class 'numpy.ndarray'>
<class 'pandas.core.frame.DataFrame'>
```

Out[69]: Text(0.5, 1.0, 'Precision - Recall curve')

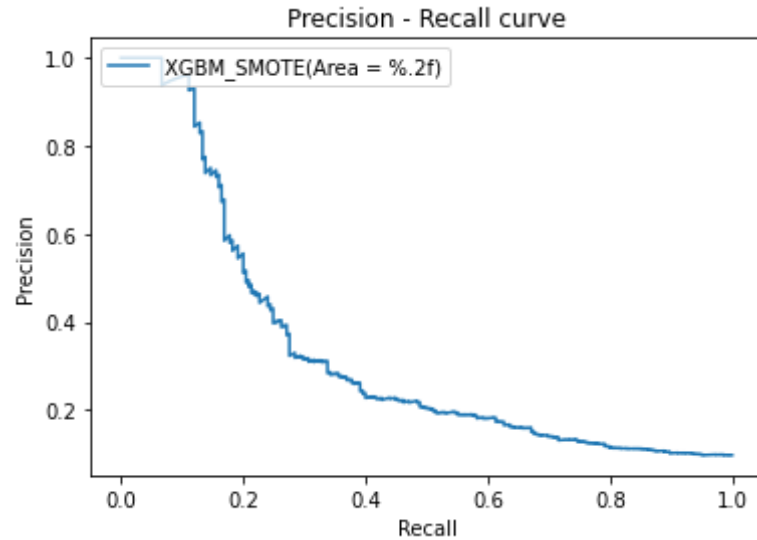

```
In [63]: #Performing XGBoost with Random UnderSampling (RUS)
model_XGBoost = XGBClassifier(random_state=42)
model_XGBoost.fit(X_train_rus, y_train_rus)
```

```
c:\users\silve\appdata\local\programs\python\python38\lib\site-packages\xgboost\sklearn.py:1146: UserWarning: The use
of label encoder in XGBClassifier is deprecated and will be removed in a future release. To remove this warning, do t
he following: 1) Pass option use_label_encoder=False when constructing XGBClassifier object; and 2) Encode your label
s (y) as integers starting with 0, i.e. 0, 1, 2, ..., [num_class - 1].
```

```
warnings.warn(label_encoder_deprecation_msg, UserWarning)
```

```
[16:53:59] WARNING: C:/Users/Administrator/workspace/xgboost-win64_release_1.4.0/src/learner.cc:1095: Starting in XGB
oost 1.3.0, the default evaluation metric used with the objective 'binary:logistic' was changed from 'error' to 'logl
oss'. Explicitly set eval_metric if you'd like to restore the old behavior.
```

```
Out[63]: XGBClassifier(base_score=0.5, booster='gbtree', colsample_bylevel=1,
                      colsample_bynode=1, colsample_bytree=1, gamma=0, gpu_id=-1,
                      importance_type='gain', interaction_constraints='',
                      learning_rate=0.300000012, max_delta_step=0, max_depth=6,
                      min_child_weight=1, missing=nan, monotone_constraints='()',
                      n_estimators=100, n_jobs=8, num_parallel_tree=1, random_state=42,
```

```
reg_alpha=0, reg_lambda=1, scale_pos_weight=1, subsample=1,
tree_method='exact', validate_parameters=1, verbosity=None)
```

In [70]:

```
#Obtaining performance metrics for XGBoost with RUS
y_pred = model_XGBoost.predict(X_test)
print(classification_report(y_test, y_pred))
confusion_matrix(y_test, y_pred)
```

|              | precision | recall | f1-score | support |
|--------------|-----------|--------|----------|---------|
| 0            | 0.94      | 0.69   | 0.79     | 2090    |
| 1            | 0.17      | 0.59   | 0.26     | 225     |
| accuracy     |           |        | 0.68     | 2315    |
| macro avg    | 0.55      | 0.64   | 0.53     | 2315    |
| weighted avg | 0.86      | 0.68   | 0.74     | 2315    |

Out[70]: array([[1434, 656],  
[ 92, 133]], dtype=int64)

In [71]:

```
#Obtaining AUROC metrics for XGBoost with RUS
y_pred_roc = model_XGBoost.predict_proba(X_test)[:,:1]
xgbRUS_fpr, xgbRUS_tpr, threshold = roc_curve(y_test, y_pred_roc)
auc_xgbRUS = auc(xgbRUS_fpr, xgbRUS_tpr)
plt.figure(figsize=(4,4), dpi = 100)
plt.plot(xgbRUS_fpr, xgbRUS_tpr, marker='.', label='xgbmRUS(auc = %0.3f)' % auc_xgbRUS)
plt.xlabel('False Positive Rate-->')
plt.ylabel('True Positive Rate -->')

plt.legend()

plt.show()
```

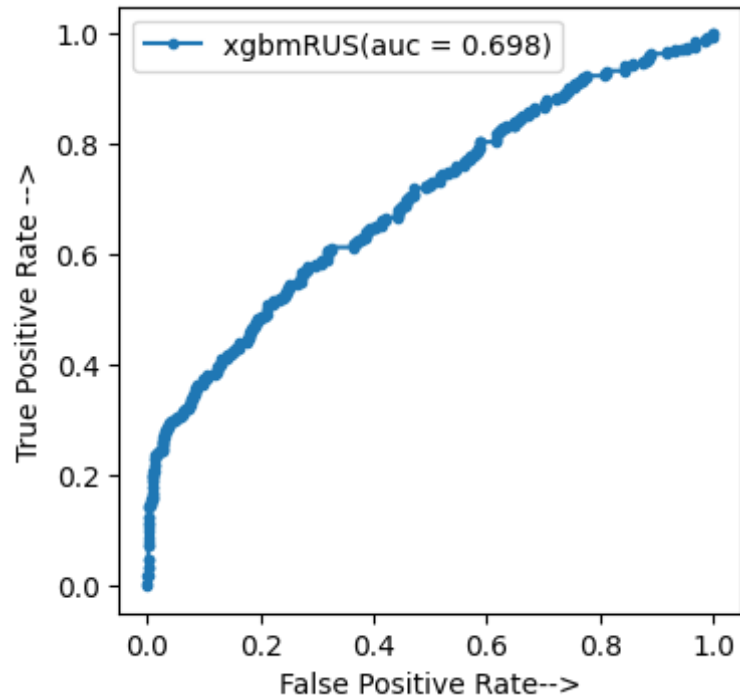

In [72]:

```
#Obtaining a Combined AUROC metrics for XGBoost Classifier
plt.figure(figsize=(4,4), dpi = 100)
plt.plot(Xgb_fpr, Xgb_tpr, marker='.', label='Xgb(auc = %0.3f)' % auc_Xgb)
plt.plot(XgbSM_fpr, XgbSM_tpr, marker='.', label='XgbmSMOTE(auc = %0.3f)' % auc_XgbSM)
plt.plot(xgbRUS_fpr, xgbRUS_tpr, marker='.', label='xgbmRUS(auc = %0.3f)' % auc_xgbRUS)
plt.xlabel('False Positive Rate-->')
plt.ylabel('True Positive Rate -->')

plt.legend()

plt.show()
```

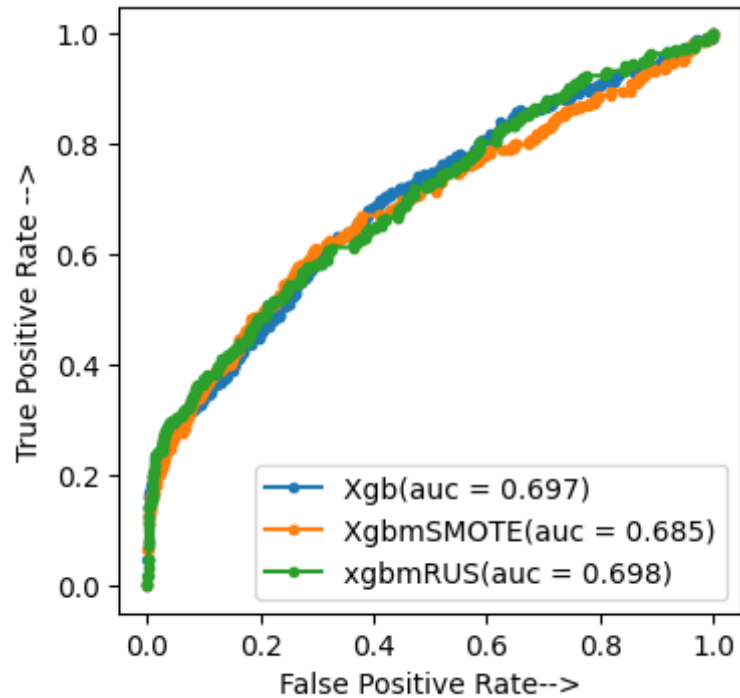

In [74]:

```
#Obtaining PR-Curve for XGBoost with RUS
y_pred_PR_curve = model_XGBoost.predict_proba(X_test)
y_pred_PR_curve
print (type(y_pred_PR_curve))
y_pred_PR_curve = pd.DataFrame(y_pred_PR_curve)
print(type(y_pred_PR_curve))
y_pred_PR_curve = y_pred_PR_curve.iloc[:,1]
y_pred_PR_curve

precision, recall, thresholds = precision_recall_curve(y_test, y_pred_PR_curve)

plt.plot(recall, precision, label = "XGBM_RUS(Area = %.2f)" )
plt.xlabel('Recall')
plt.ylabel('Precision')
plt.legend(loc = "upper left")
plt.title("Precision - Recall curve")
```

```
<class 'numpy.ndarray'>  
<class 'pandas.core.frame.DataFrame'>
```

Out[74]: Text(0.5, 1.0, 'Precision - Recall curve')

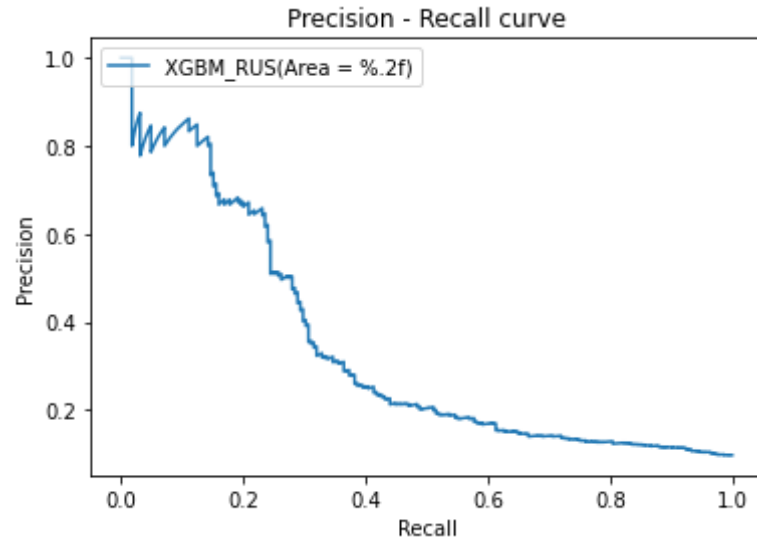

```
In [75]: #Performing Borderline smote with ADABOOST  
from imblearn.over_sampling import BorderlineSMOTE  
#Transform the dataset  
oversample = BorderlineSMOTE(k_neighbors=2)  
X = df.copy()  
X.pop('Apgar_score')  
y = df['Apgar_score']  
X, y = oversample.fit_resample(X, y)
```

```
In [76]: from collections import Counter  
counter = Counter(y)  
print (counter)
```

```
Counter({0: 6983, 1: 6983})
```

```
In [77]:
```

```
X_train_bdsm, X_test_bdsm, y_train_bdsm, y_test_bdsm = train_test_split(X, y,  
                                                                    test_size=0.3,  
                                                                    random_state=42)
```

In [78]:

```
#Building the AdaBoost Model with BD_SMOTE  
# Create adaboost classifier object  
abc = AdaBoostClassifier(n_estimators=150,  
                        learning_rate=1)  
# Train Adaboost Classifier  
model = abc.fit(X_train_bdsm, y_train_bdsm)  
  
#Predict the response for test dataset  
y_pred = model.predict(X_test_bdsm)  
  
#Trying ROC metrics  
y_pred_roc = model.decision_function(X_test_bdsm)  
AdbstBDsmote_fpr, AdbstBDsmote_tpr, threshold = roc_curve(y_test_bdsm, y_pred_roc)  
auc_Adbst_bdsm = auc(AdbstBDsmote_fpr, AdbstBDsmote_tpr)  
  
plt.figure(figsize=(4,4), dpi = 100)  
plt.plot(AdbstBDsmote_fpr, AdbstBDsmote_tpr, marker='.', label='AdaBoost_BDSmote(auc = %0.3f)' % auc_Adbst_bdsm)  
  
plt.xlabel('False Positive Rate-->')  
plt.ylabel('True Positive Rate -->')  
  
plt.legend()  
  
plt.show()
```



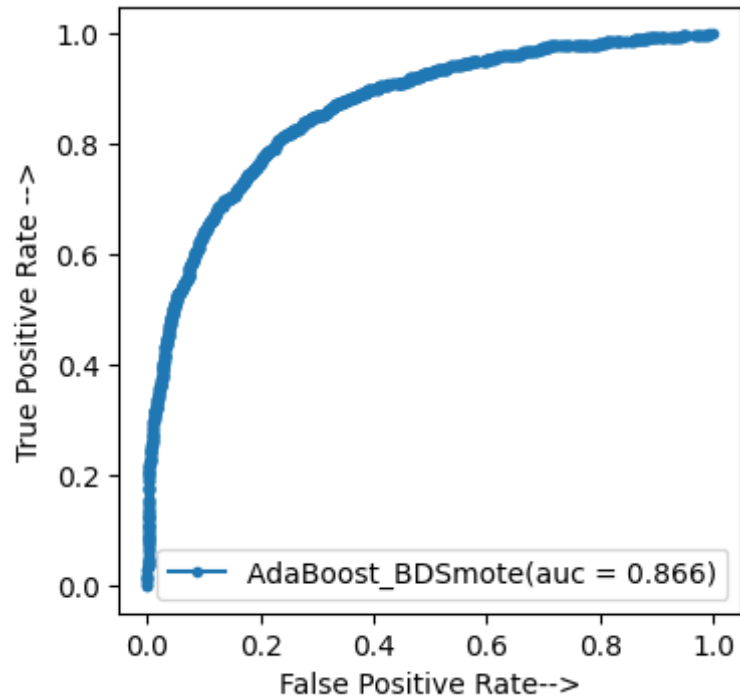

```
In [79]: # Classification metrics for AdaBoost with BD_SMOTE
print("Accuracy:", metrics.accuracy_score(y_test_bdsm, y_pred))
print(classification_report(y_test_bdsm, y_pred))
confusion_matrix(y_test_bdsm, y_pred)
```

```
Accuracy: 0.7859188544152744
          precision    recall  f1-score   support

     0       0.78        0.79        0.79        2092
     1       0.79        0.78        0.78        2098

 accuracy          0.79          0.79          0.79          4190
 macro avg         0.79          0.79          0.79          4190
 weighted avg      0.79          0.79          0.79          4190
```

```
Out[79]: array([[1658,  434],
                [ 463, 1635]], dtype=int64)
```

```
In [82]: # Obtaining PR-curve for AdaBoost with BD_SMOTE
y_pred_PR_curve = model.predict_proba(X_test_bdsm)
y_pred_PR_curve
print (type(y_pred_PR_curve))
y_pred_PR_curve = pd.DataFrame(y_pred_PR_curve)
print(type(y_pred_PR_curve))
y_pred_PR_curve = y_pred_PR_curve.iloc[:,1]
y_pred_PR_curve

precision, recall, thresholds = precision_recall_curve(y_test_bdsm, y_pred_PR_curve)

plt.plot(recall, precision, label = "AdaBoost_BDsmote(Area = %.2f)" )
plt.xlabel('Recall')
plt.ylabel('Precision')
plt.legend(loc = "upper left")
plt.title("Precision - Recall curve")
```

```
<class 'numpy.ndarray'>
<class 'pandas.core.frame.DataFrame'>
```

```
Out[82]: Text(0.5, 1.0, 'Precision - Recall curve')
```

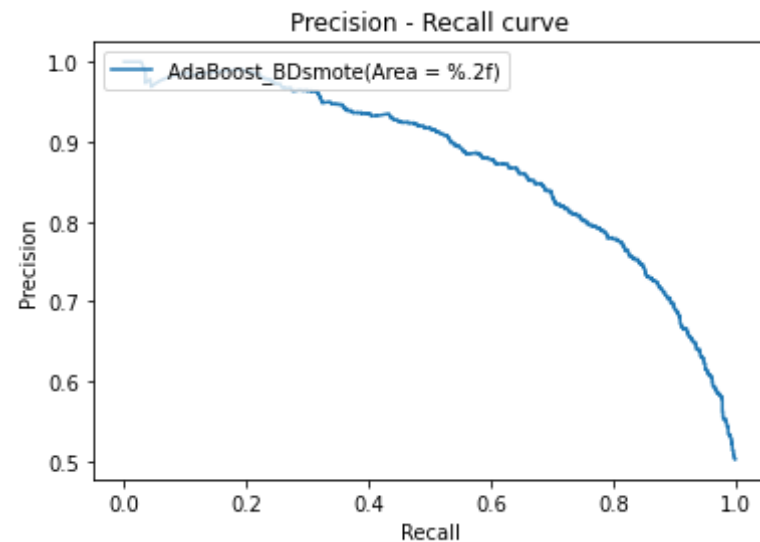

```
In [83]: #Performing Borderline_SMOTE on Gradient Boosting
model_gbm = GradientBoostingClassifier(random_state=42)
```

```
model_gbm.fit(X_train_bdsm, y_train_bdsm)
y_pred_gb = model_gbm.predict(X_test_bdsm)
```

```
In [84]: #Obtainig performance metrics for Gradient Boosting with Borderline_SMOTE
print(classification_report(y_test_bdsm, y_pred_gb))
confusion_matrix(y_test_bdsm, y_pred_gb)
```

|              | precision | recall | f1-score | support |
|--------------|-----------|--------|----------|---------|
| 0            | 0.82      | 0.85   | 0.83     | 2092    |
| 1            | 0.84      | 0.82   | 0.83     | 2098    |
| accuracy     |           |        | 0.83     | 4190    |
| macro avg    | 0.83      | 0.83   | 0.83     | 4190    |
| weighted avg | 0.83      | 0.83   | 0.83     | 4190    |

```
Out[84]: array([[1768,  324],
               [ 376, 1722]], dtype=int64)
```

```
In [85]: #Obtainig AUROC for Gradient Boosting with Borderline_SMOTE
y_pred_roc = model_gbm.decision_function(X_test_bdsm)
gbmBDsmote_fpr, gbmBDsmote_tpr, threshold = roc_curve(y_test_bdsm, y_pred_roc)
auc_gbm_BDsmote = auc(gbmBDsmote_fpr, gbmBDsmote_tpr)
plt.figure(figsize=(4,4), dpi = 100)
plt.plot(gbmBDsmote_fpr, gbmBDsmote_tpr, marker='.', label='GB_BDsmote(auc = %0.3f)' % auc_gbm_BDsmote)
plt.xlabel('False Positive Rate-->')
plt.ylabel('True Positive Rate -->')

plt.legend()

plt.show()
```

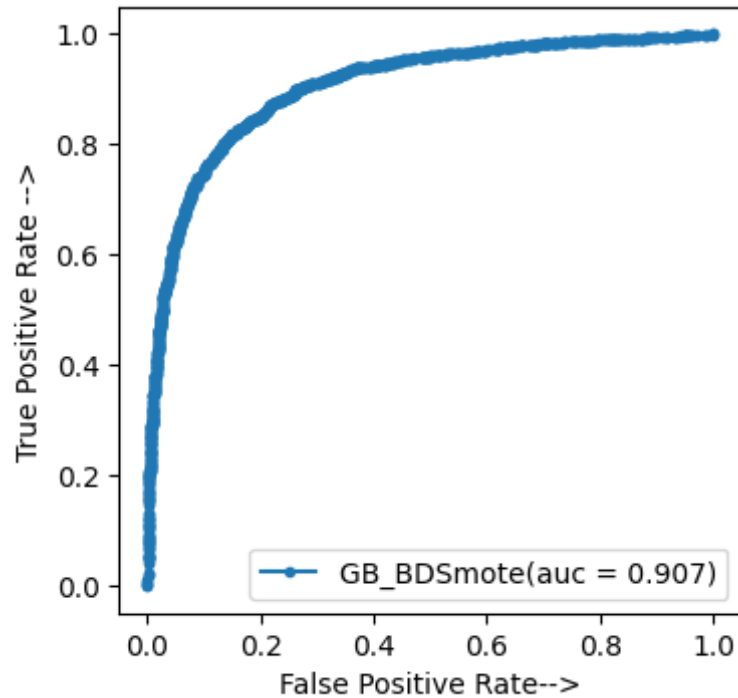

In [87]:

```

## Obtaining PR-curve for Gradient Boosting with BD_SMOTE
y_pred_PR_curve = model_gbm.predict_proba(X_test_bdsm)
y_pred_PR_curve
print (type(y_pred_PR_curve))
y_pred_PR_curve = pd.DataFrame(y_pred_PR_curve)
print(type(y_pred_PR_curve))
y_pred_PR_curve = y_pred_PR_curve.iloc[:,1]
y_pred_PR_curve

precision, recall, thresholds = precision_recall_curve(y_test_bdsm, y_pred_PR_curve)

plt.plot(recall, precision, label = "GBM_BDSmote(Area = %.2f)" )
plt.xlabel('Recall')
plt.ylabel('Precision')
plt.legend(loc = "upper left")
plt.title("Precision - Recall curve")

```

```
<class 'numpy.ndarray'>
<class 'pandas.core.frame.DataFrame'>
```

Out[87]: Text(0.5, 1.0, 'Precision - Recall curve')

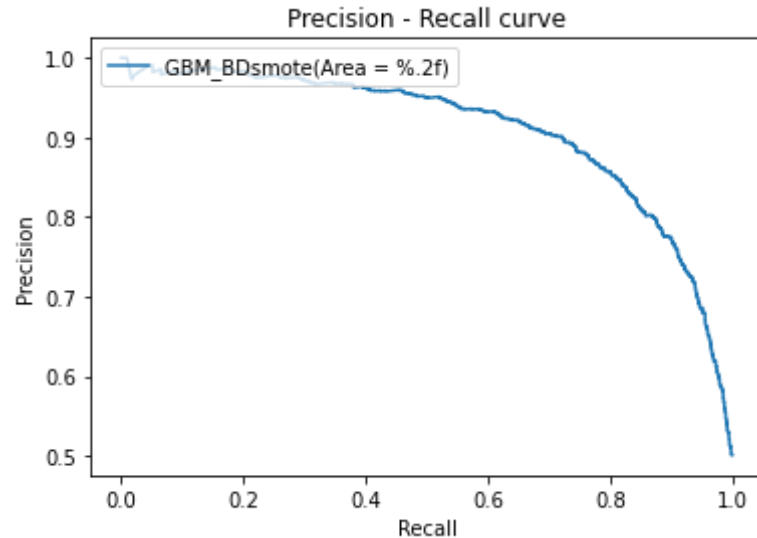

```
In [89]: #Performing Borderline_SMOTE on XGBoost Classifier
model = XGBClassifier(random_state=42)
model.fit(X_train_bdsm, y_train_bdsm)
y_pred_xgb_bdsm = model.predict(X_test_bdsm)
```

```
c:\users\silve\appdata\local\programs\python\python38\lib\site-packages\xgboost\sklearn.py:1146: UserWarning: The use
of label encoder in XGBClassifier is deprecated and will be removed in a future release. To remove this warning, do t
he following: 1) Pass option use_label_encoder=False when constructing XGBClassifier object; and 2) Encode your label
s (y) as integers starting with 0, i.e. 0, 1, 2, ..., [num_class - 1].
```

```
warnings.warn(label_encoder_deprecation_msg, UserWarning)
[17:28:45] WARNING: C:/Users/Administrator/workspace/xgboost-win64_release_1.4.0/src/learner.cc:1095: Starting in XGB
oost 1.3.0, the default evaluation metric used with the objective 'binary:logistic' was changed from 'error' to 'logl
oss'. Explicitly set eval_metric if you'd like to restore the old behavior.
```

```
In [91]: #Obtaining performance metrics for XGBoost with SMOTE
print(classification_report(y_test_bdsm,y_pred_xgb_bdsm))
confusion_matrix(y_test_bdsm, y_pred_xgb_bdsm)
```

```
precision    recall  f1-score   support
```

|              |      |      |      |      |
|--------------|------|------|------|------|
| 0            | 0.93 | 0.94 | 0.94 | 2092 |
| 1            | 0.94 | 0.93 | 0.93 | 2098 |
| accuracy     |      |      | 0.93 | 4190 |
| macro avg    | 0.93 | 0.93 | 0.93 | 4190 |
| weighted avg | 0.93 | 0.93 | 0.93 | 4190 |

```
Out[91]: array([[1975, 117],  
               [ 156, 1942]], dtype=int64)
```

```
In [90]: #Obtainig AUROC for XGBoost with Borderline_SMOTE  
y_pred_roc = model.predict_proba(X_test_bdsm)[:,-1]  
XgbBDsmote_fpr, XgbBDsmote_tpr, threshold = roc_curve(y_test_bdsm, y_pred_roc)  
auc_XgbBDsmote = auc(XgbBDsmote_fpr, XgbBDsmote_tpr)  
plt.figure(figsize=(4,4), dpi = 100)  
plt.plot(XgbBDsmote_fpr, XgbBDsmote_tpr, marker='.', label='XgbBDSMOTE(auc = %0.3f)' % auc_XgbBDsmote)  
plt.xlabel('False Positive Rate-->')  
plt.ylabel('True Positive Rate -->')  
  
plt.legend()  
  
plt.show()
```

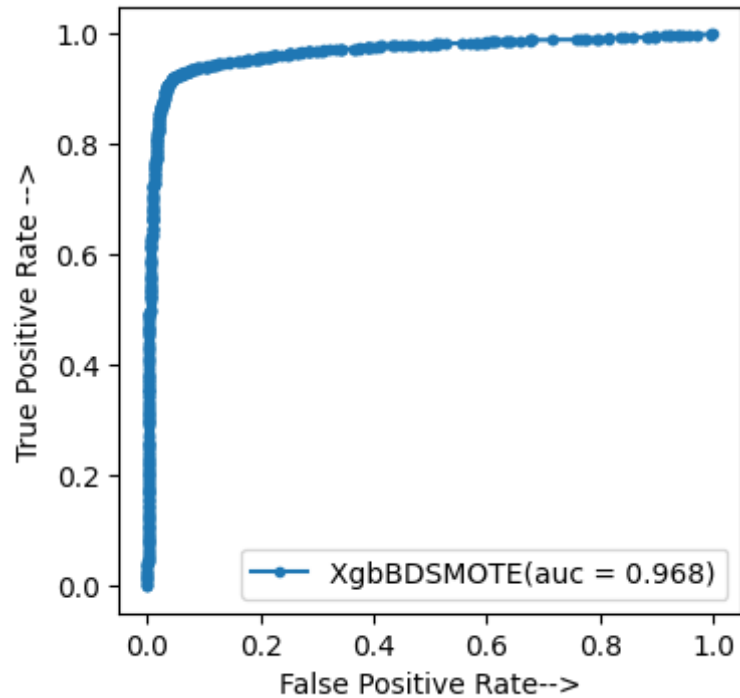

In [92]:

```
#Obtaining a Combined AUROC metrics for AdaBoost Classifier
plt.figure(figsize=(4,4), dpi = 100)
plt.plot(Adbst_fpr, Adbst_tpr, marker='.', label='AdaBoost(auc = %0.3f)' % auc_Adbst)
plt.plot(AdbstSM_fpr, AdbstSM_tpr, marker='.', label='AdaBoost_SMOTE(auc = %0.3f)' % auc_AdbstSM)
plt.plot(AdbstBDsmote_fpr, AdbstBDsmote_tpr, marker='.', label='AdaBoost_BD-SMOTE(auc = %0.3f)' % auc_Adbst_bdsm)
plt.plot(AdbstRUS_fpr, AdbstRUS_tpr, marker='.', label='AdaBoost_RUS(auc = %0.3f)' % auc_AdbstRUS)
plt.xlabel('False Positive Rate-->')
plt.ylabel('True Positive Rate -->')

plt.legend()

plt.show()
```

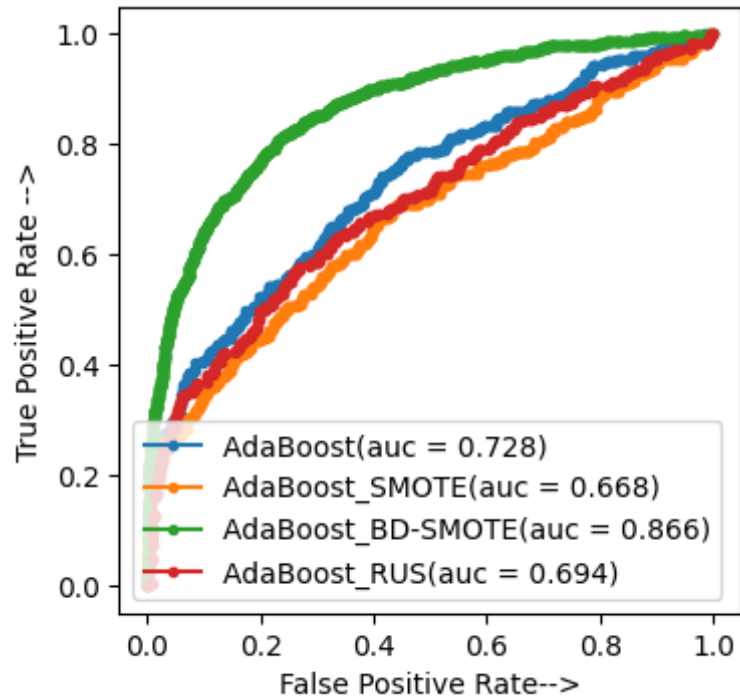

In [94]:

```
#Trying PR-Curve
y_pred_PR_curve = model.predict_proba(X_test_bdsm)
y_pred_PR_curve
print (type(y_pred_PR_curve))
y_pred_PR_curve = pd.DataFrame(y_pred_PR_curve)
print(type(y_pred_PR_curve))
y_pred_PR_curve = y_pred_PR_curve.iloc[:,1]
y_pred_PR_curve

precision, recall, thresholds = precision_recall_curve(y_test_bdsm, y_pred_PR_curve)

<class 'numpy.ndarray'>
<class 'pandas.core.frame.DataFrame'>
```

In [95]:

```
plt.plot(recall, precision, label = "GBM_BDsmote(Area = %.2f)" )
plt.xlabel('Recall')
plt.ylabel('Precision')
```



```
plt.legend(loc = "upper left")
plt.title("Precision - Recall curve")
```

Out[95]: Text(0.5, 1.0, 'Precision - Recall curve')

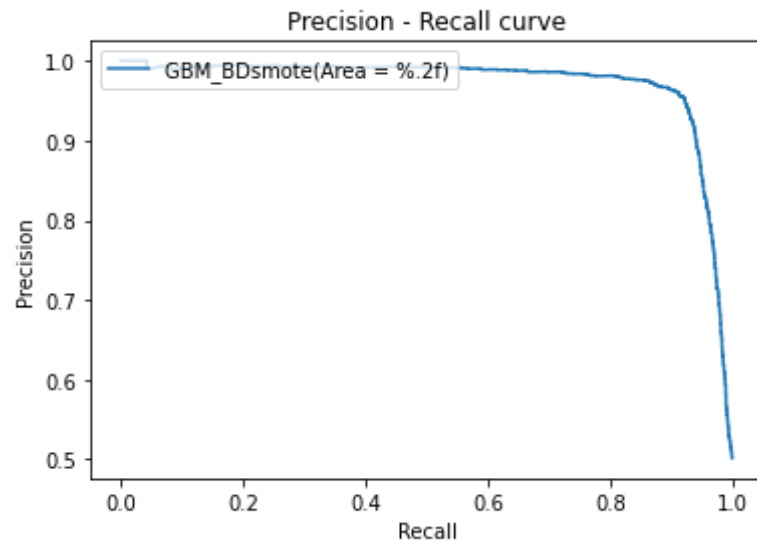

In [96]:

```
#Obtaining a Combined AUROC metrics for Gradient Boosting Classifier
plt.figure(figsize=(4,4), dpi = 100)
plt.plot(gbm_fpr, gbm_tpr, marker='.', label='GB(auc = %0.3f)' % auc_gbm)
plt.plot(gbSM_fpr, gbSM_tpr, marker='.', label='GB_SMOTE(auc = %0.3f)' % auc_gbSM)
plt.plot(gbmBDsmote_fpr, gbmBDsmote_tpr, marker='.', label='GB_BD-SMOTE(auc = %0.3f)' % auc_gbm_BDsmote)
plt.plot(gbRUS_fpr, gbRUS_tpr, marker='.', label='GB-RUS(auc = %0.3f)' % auc_gbRUS)
plt.xlabel('False Positive Rate-->')
plt.ylabel('True Positive Rate -->')

plt.legend()

plt.show()
```

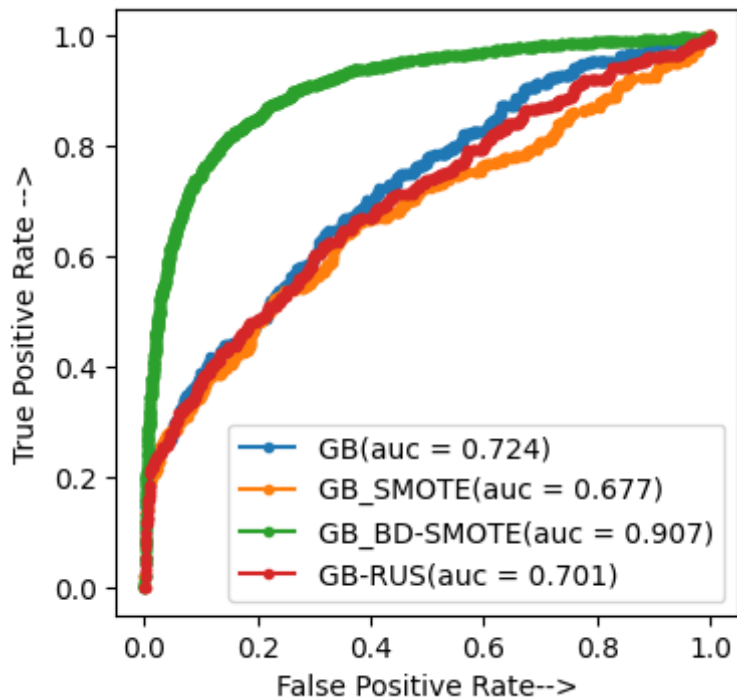

In [97]:

```
#Obtaining a Combined AUROC metrics for XGBoost Classifier
plt.figure(figsize=(4,4), dpi = 100)
plt.plot(Xgb_fpr, Xgb_tpr, marker='.', label='XGb(auc = %0.3f)' % auc_Xgb)
plt.plot(XgbSM_fpr, XgbSM_tpr, marker='.', label='XGb_SMOTE(auc = %0.3f)' % auc_XgbSM)
plt.plot(XgbBDsmote_fpr, XgbBDsmote_tpr, marker='.', label='XGb_BD-SMOTE(auc = %0.3f)' % auc_XgbBDsmote)
plt.plot(xgbRUS_fpr, xgbRUS_tpr, marker='.', label='XGb_RUS(auc = %0.3f)' % auc_xgbRUS)
plt.xlabel('False Positive Rate-->')
plt.ylabel('True Positive Rate -->')

plt.legend()

plt.show()
```

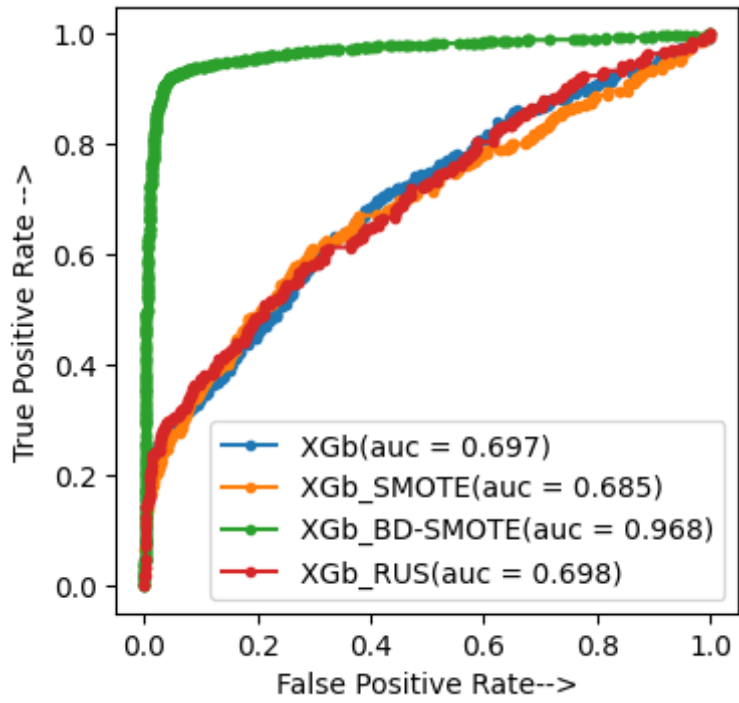

Supplement: Supplementary file 1 [file get_supplementary_file.php]
